# Supplementary material for: Highly efficient Lewis acid-catalysed Pictet–Spengler reactions discovered by parallel screeningElectronic supplementary information (ESI) available: full experimental procedures. See http://www.rsc.org/suppdata/cc/b2/b212063a/
Source: Royal Society of Chemistry journal article supplement (doi:10.1039/b212063a), 2003-03-11
Supplement: b212063a.doc [file b212063a.doc]

# Highly efficient Lewis acid-catalysed Pictet-Spengler reactions discovered by parallel screening

Natarajan Srinivasan and A. Ganesan*

# Combinatorial Centre of Excellence, Department of Chemistry, University of Southampton, Southampton SO17 1BJ, United Kingdom.

## Supporting information

# Experimental Section

All reagents were purchased from Aldrich and used with no further purification. Dichloromethane was freshly distilled over calcium hydride. 1H-and 13C-NMR spectra were recorded using a BRUKER DPX400 Spectrometer (400 MHz and 100 MHz respectively). IR spectra were taken using a Biorad 135 Spectrophotometer. TLC was done using ALUGRAM SIL G/UV254 TLC plates (0.20mm thickness) using hexane, ethyl acetate (3:2 v/v) as eluent, with visualisation by UV or Dragendorff’s spray reagent. Reverse phase HPLC analysis was carried out using a C18 column with linear gradient 60-40% MeCN / water in 12 min (flow rate 1mL / min). Microwave-assisted reactions were performed using a Smith SynthesizerTM.

# I. Parallel screening of Lewis Acids

a) Initial screening (Table 1 of paper):

To a solution of imine (**1a**) in dichloromethane (100 mg, 0.325 mmol, 3ml), Lewis acid (20 mg) was added and the reaction mixture stirred under inert atmosphere. After 20 h, the reaction mixture was filtered through a short (0.5 cm) pad of Celite®. The clear filtrate was evaporated to dryness to give the crude product.

b) Further investigation of promising catalysts (Table 2 of paper):

The reactions were carried out as above. After 25 h, the reaction mixture was diluted with dichloromethane (10mL), washed with water (2 x 10mL) and saturated brine (10 mL). The resultant organic layer was dried over anhydrous MgSO4 before evaporation under reduced pressure to yield crude **2a** (85-92 purity % by HPLC).

II. Preparation of tetrahydro--carbolines using preformed imines.

a) With imines 1a-1eof L-tryptophan methyl ester:

Imine[[1]](#footnote-2) (**1a**-**1e**, 200 mg) and 20 mg of Yb(OTf)3 (anhydrous, 99.9 % purity) were placed in a microwave vial. After capping, dichloromethane (2.5 mL) was added and the vial was flushed with argon using needles of very small diameter and a balloon containing argon for 15 seconds. The vial was then heated at 100 °C in a Smith SynthesizerTM for 30 min. After cooling, the vial was decapped and the contents transferred to an extraction funnel (25 mL capacity). The reaction mixture was further diluted with dichloromethane (10 mL) and washed with water (2x10 mL) followed by saturated brine solution. The clear organic phase was stirred with 1 g of Amberlyst®15 ion exchange resin for 5 hours, filtered, and washed with dichloromethane (4x3 mL). The washed resin was treated with 5mL of ammonia (2M solution in 2-propanol, Aldrich) and stirred for 30 min at room temperature. The resin was carefully removed from the ammoniacal solution containing the pure tetrahydro--carboline by filtration and washing with dichloromethane (2x3 mL). The filtrate upon evaporation to dryness yielded exclusively the pure isomeric mixture of tetrahydro--carbolines **2a**-**2e**.

**b) With imines 1f-1j of tryptamine:**

Imine (**1f**-**1j**, 200 mg), Yb(OTf)3 (40 mg), and [bmim]Cl-AlCl3, *N* = 0.5, (200 mg) were charged in a microwave vial. Dichloromethane (3 mL) was added after capping and the vial flushed with argon. The vial was heated at 120 °C in the Smith SynthesizerTM for 60 min. The heterogeneous reaction mixture was transferred to an extraction funnel by washing with water (5 mL) and dichloromethane (5 mL). The resulting biphasic reaction mixture was further treated with 20% NaOH solution (5 mL) and extracted with dichloromethane (2x5 mL). The separated organic layer was washed with water (2x5 mL) followed by saturated brine (5 mL) before drying with anhydrous MgSO4. The dried organic phase was evaporated under reduced pressure to furnish the desired product **2f**-**2j** as solids (HPLC purity >98%). If desired, further purification could be carried out with the ion-exchange protocol described above.

**III. One-pot synthesis of tetrahydro--carbolines.**

**a) With L-Tryptophan methyl ester and aldehyde:**

L-Tryptophan methyl ester (200 mg, 0.92 mmol) and 20 mg of Yb(OTf)3 was placed in a microwave vial followed by the addition of dichloromethane (3 mL). The vial was carefully capped and flushed with argon before adding the aldehyde (1.11 mmol, 1.2 equiv). The vial was heated to 100 °C for 30 min and then decapped. After workup (see procedure II above), the organic phase was stirred with 400 mg of aminomethylated polystyrene VHL resin[[2]](#footnote-3) (*Novabiochem*, loading 1.2-1.6 mmol/g) until excess aldehyde was scavenged (10-12 h, monitored by TLC, eluent 3:2 hexane:ethyl acetate). The resin was filtered, washed with dichloromethane (3x2 mL), and the combined filtrates evaporated to give pure **2a**-**2e**. The HPLC profile of **2a** before and after scavenging is appended.

b) With tryptamine and aldehyde:

The above procedure was followed with tryptamine (200 mg, 1.22 mmol), Yb(OTf)3 (40 mg), [bmim]Cl-AlCl3, *N* = 0.5, (200 mg) and aldehyde (1.46 mmol, 1.2 equiv.). Workup yielded **2f**-**2j**, which were further purified by the scavenging amine resins as above. The HPLC profile of **2g** before and after scavenging is appended.

**A Sample HPLC profile for the purification of 2a using aminomethyl polystyrene resin**

|  |
| --- |
|  |
| Reaction mixture containing excess benzaldehyde and product **2a** (cis/trans diastereomers) before treatment with aminomethyl polystyrene resin |
|  |
| Reaction mixture after treatment with aminomethyl polystyrene resin |
|  |

**A Sample HPLC profile for the purification of 2g using PS-Trisamine**

|  |
| --- |
| Crude product mixture (containing **2g** and excess *p*-NO2-benzaldehyde) |
|  |
| Product after purification using PS-Trisamine resin |

1. Imines were prepared from the amine and aldehyde using magnesium sulfate as dehydrating agent. See, for example, R. Grigg, W. S. MacLachlan, D. T. MacPherson, V. Sridharan, S. Suganthan, M. Thornton-Pett and J.Zhang, *Tetrahedron,* 2000, **56**, 6585-6594. [↑](#footnote-ref-2)
2. In some cases (**1c**, **1e**, **2g** and **2h**), the scavenging was carried out with 150 mg of PS-Trisamine resin (*Argonaut*, loading 4.27 mmol/g). [↑](#footnote-ref-3)
